# Supplementary material for: Novel group of tyrosyl-DNA-phosphodiesterase 1 inhibitors based on disaccharide nucleosides as drug prototypes for anti-cancer therapy
Source: PubMed Central journal article supplement (PMC6136360; doi:10.1080/14756366.2018.1509210), 2018-09-07

### **Partition coefficient (logP)**

To estimate the distribution of the studied compounds within the cell partition coefficient (logP) was calculated for all compounds (see Table 1). Partition coefficient (logP) was determined as the ratio of concentrations of a compound in a mixture of two immiscible phases at equilibrium, one of the solvents being water while the second being 1-octanol. Disaccharide nucleosides in which all the hydroxyl groups are blocked demonstrate the highest hydrophobicity with octanol/water partition coefficients being in the range from 10.08 to 13.27. Therefore, they are distributed mainly to hydrophobic areas such as lipid bilayers of cells. Conversely, disaccharide nucleosides possessing free hydroxyl groups and phosphate groups demonstrate the highest hydrophilicity with octanol/water partition coefficients being in the range from -4.26 to -1.67 and may be found primarily in aqueous regions such as cytosol. Partially deblocked disaccharide compounds are characterized by moderate values of logP and hence are amphiphilic. These compounds may be distributed both to lipid bilayers of a cellular membrane and to aqueous media of a cytosol and an organelles, thus having a potency to penetrate through lipophilic membrane and interact with various proteins inside a cell.

Table 1. Structural formulas and inhibitory activities for the investigated disaccharide nucleosides.

| Structural formula                                                                                                                        | Base              | Modifications        |                                                  | IC <sub>50</sub> , μM                       | logP       | Compound number |                                 |
|-------------------------------------------------------------------------------------------------------------------------------------------|-------------------|----------------------|--------------------------------------------------|---------------------------------------------|------------|-----------------|---------------------------------|
|                                                                                                                                           |                   | Base                 | The first ribofuranosyl moiety                   |                                             |            |                 | The second ribofuranosyl moiety |
| 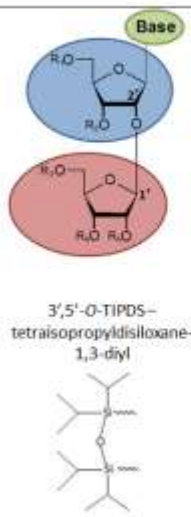 <p>3',5'-O-TIPDS-tetraisopropylidisiloxane-1,3-diyl</p> | A                 | -                    | -                                                | -                                           | >100       | -3.23           | 1                               |
|                                                                                                                                           |                   | -                    | -                                                | α-D-ribofuranosyl                           | >100       | -3.23           | 2                               |
|                                                                                                                                           | T                 | Ade <sup>Bz</sup>    | 3',5'-O-TIPDS                                    | 2',3',5'-tri-O-benzoyl                      | 40 ± 10    | -4.12           | 3                               |
|                                                                                                                                           |                   | -                    | -                                                | -                                           | 1.3 ± 0.2  | 11.52           | 4                               |
|                                                                                                                                           | G                 | -                    | -                                                | -                                           | >100       | -3.16           | 5                               |
|                                                                                                                                           |                   | -                    | 5'-phosphate (Na <sup>+</sup> salt)              | -                                           | 18.5 ± 0.8 | -3.26           | 6                               |
|                                                                                                                                           | C                 | -                    | 3',5'-O-TIPDS                                    | 2',3',5'-tri-O-benzoyl                      | 1.9 ± 0.3  | 10.08           | 7                               |
|                                                                                                                                           |                   | -                    | -                                                | -                                           | >100       | -3.85           | 8                               |
|                                                                                                                                           | U                 | -                    | -                                                | 5'-phosphate (Na <sup>+</sup> salt)         | >100       | -4.26           | 9                               |
|                                                                                                                                           |                   | Gua <sup>i-But</sup> | -                                                | 2',3',5'-tri-O-benzoyl                      | 5.9 ± 0.7  | 4.81            | 10                              |
|                                                                                                                                           | C                 | Gua <sup>i-But</sup> | 3',5'-O-TIPDS                                    | 2',3',5'-tri-O-benzoyl                      | 0.7 ± 0.2  | 9.68            | 11                              |
|                                                                                                                                           |                   | -                    | -                                                | -                                           | >100       | -3.94           | 12                              |
|                                                                                                                                           |                   | Cyt <sup>Bz</sup>    | -                                                | 2',3',5'-tri-O-benzoyl                      | 2.6 ± 0.2  | 5.33            | 13                              |
|                                                                                                                                           |                   | Cyt <sup>Bz</sup>    | 3',5'-O-TIPDS                                    | 2',3',5'-tri-O-benzoyl-α-L-arabinofuranosyl | 1.7 ± 0.4  | 5.33            | 14                              |
|                                                                                                                                           | U                 | Cyt <sup>Bz</sup>    | 3',5'-O-TIPDS                                    | 2',3',5'-tri-O-benzoyl-α-L-arabinofuranosyl | 0.6 ± 0.1  | 11.51           | 15                              |
|                                                                                                                                           |                   | -                    | -                                                | 2',3',5'-tri-O-benzoyl                      | 0.4 ± 0.1  | 11.51           | 16                              |
|  <p>5'-TBDPS-tert-butylidiphenylsilyl</p>               | A                 | -                    | -                                                | -                                           | >100       | -3.56           | 17                              |
|                                                                                                                                           |                   | -                    | -                                                | α-D-ribofuranosyl                           | >100       | -3.56           | 18                              |
|                                                                                                                                           | T                 | 5-F-Ura              | -                                                | -                                           | >100       | -3.36           | 19                              |
|                                                                                                                                           |                   | 5-F-Ura              | -                                                | 2',3',5'-tri-O-benzoyl                      | 14 ± 2     | 4.13            | 20                              |
|                                                                                                                                           | G                 | -                    | 3',5'-O-TIPDS                                    | 2',3',5'-tri-O-benzoyl                      | 0.9 ± 0.1  | 10.15           | 21                              |
|                                                                                                                                           |                   | -                    | -                                                | -                                           | >100       | -2.33           | 22                              |
|                                                                                                                                           | A                 | -                    | α-D-2'-deoxyribofuranosyl                        | -                                           | >100       | -2.33           | 23                              |
|                                                                                                                                           |                   | -                    | -                                                | -                                           | >100       | -2.26           | 24                              |
|                                                                                                                                           | T                 | -                    | 5'-phosphate (NH <sub>4</sub> <sup>+</sup> salt) | 5'-phosphate (Na <sup>+</sup> salt)         | >100       | -2.38           | 25                              |
|                                                                                                                                           |                   | -                    | -                                                | -                                           | >100       | -2.38           | 26                              |
|                                                                                                                                           | C                 | -                    | -                                                | β-D-ribofuranose                            | >100       | -2.26           | 27                              |
|                                                                                                                                           |                   | -                    | -                                                | β-D-2',3',4'-tri-O-acetylribofuranose       | >100       | -0.94           | 28                              |
|                                                                                                                                           | U                 | -                    | α-D-2'-deoxyribofuranosyl                        | 2',3'-dialdehyde                            | >100       | -1.96           | 29                              |
|                                                                                                                                           |                   | -                    | α-D-2'-deoxyribofuranosyl                        | 2',3'-dialdehyde                            | >100       | -1.96           | 30                              |
|                                                                                                                                           | G                 | -                    | 5'-O-β-D-ribofuranosyl                           | -                                           | >100       | -2.26           | 31                              |
|                                                                                                                                           |                   | -                    | 5'-O-(2',3',5'-tri-O-benzoyl-β-D-ribofuranosyl)  | 2',3',5'-tri-O-benzoyl                      | 1.0 ± 0.1  | 11.57           | 33                              |
| C                                                                                                                                         | -                 | -                    | -                                                | >100                                        | -2.95      | 34              |                                 |
|                                                                                                                                           | Cyt <sup>Bz</sup> | -                    | 2',3',5'-tri-O-benzoyl                           | >100                                        | -3.04      | 35              |                                 |
| U                                                                                                                                         | Cyt <sup>Bz</sup> | 5'-TBDPS             | 2',3',5'-tri-O-benzoyl                           | 1.5 ± 0.2                                   | 6.23       | 36              |                                 |
|                                                                                                                                           | -                 | -                    | -                                                | 0.9 ± 0.1                                   | 13.27      | 37              |                                 |
| A                                                                                                                                         | 5-I-Ura           | -                    | -                                                | >100                                        | -2.65      | 38              |                                 |
|                                                                                                                                           | 5-I-Ura           | -                    | -                                                | >100                                        | -1.67      | 39              |                                 |
| G                                                                                                                                         | 5-I-Ura           | -                    | β-D-ribofuranose                                 | >100                                        | -1.67      | 40              |                                 |
|                                                                                                                                           | 5-I-Ura           | -                    | 2',3',5'-tri-O-benzoyl                           | 2.8 ± 0.2                                   | 5.82       | 41              |                                 |
| C                                                                                                                                         | 5-I-Ura           | 5'-TBDPS             | 2',3',5'-tri-O-benzoyl                           | 0.8 ± 0.1                                   | 12.76      | 42              |                                 |
|                                                                                                                                           | -                 | -                    | -                                                | >100                                        | -2.33      | 43              |                                 |
| T                                                                                                                                         | -                 | -                    | -                                                | >100                                        | -2.26      | 44              |                                 |
|                                                                                                                                           | -                 | -                    | -                                                | 70 ± 10                                     | -2.95      | 45              |                                 |
| G                                                                                                                                         | -                 | -                    | -                                                | >100                                        | -3.04      | 46              |                                 |
|                                                                                                                                           | -                 | -                    | -                                                | 30 ± 10                                     | -2.65      | 47              |                                 |
| U                                                                                                                                         | 5-I-Ura           | -                    | -                                                | >100                                        | -1.67      | 48              |                                 |
|                                                                                                                                           | 5-F-Ura           | -                    | -                                                | >100                                        | -2.46      | 49              |                                 |

1. \*R<sub>x</sub> – substituting group, in case of “-“ R=H;
2. Ade<sup>Bz</sup> - N<sup>6</sup>-Benzoyladenine-9-yl
3. Gua<sup>i-But</sup> - N<sup>2</sup>-Isobutyrylguanine-9-yl
4. Cyt<sup>Bz</sup> - N<sup>4</sup>-Benzoylcytosine-1-yl
5. 5-F-Ura - 5-Fluorouracil-1-yl
6. 5-I-Ura - 5-Iodouracil-1-yl

The examples of typical kinetic plots for selected inhibitors (4, 6, 7, 10, 11, 21, 41) on single-stranded substrate

Inhibitor 4 (mixed)  $K_I = 0.3 \pm 0.1$

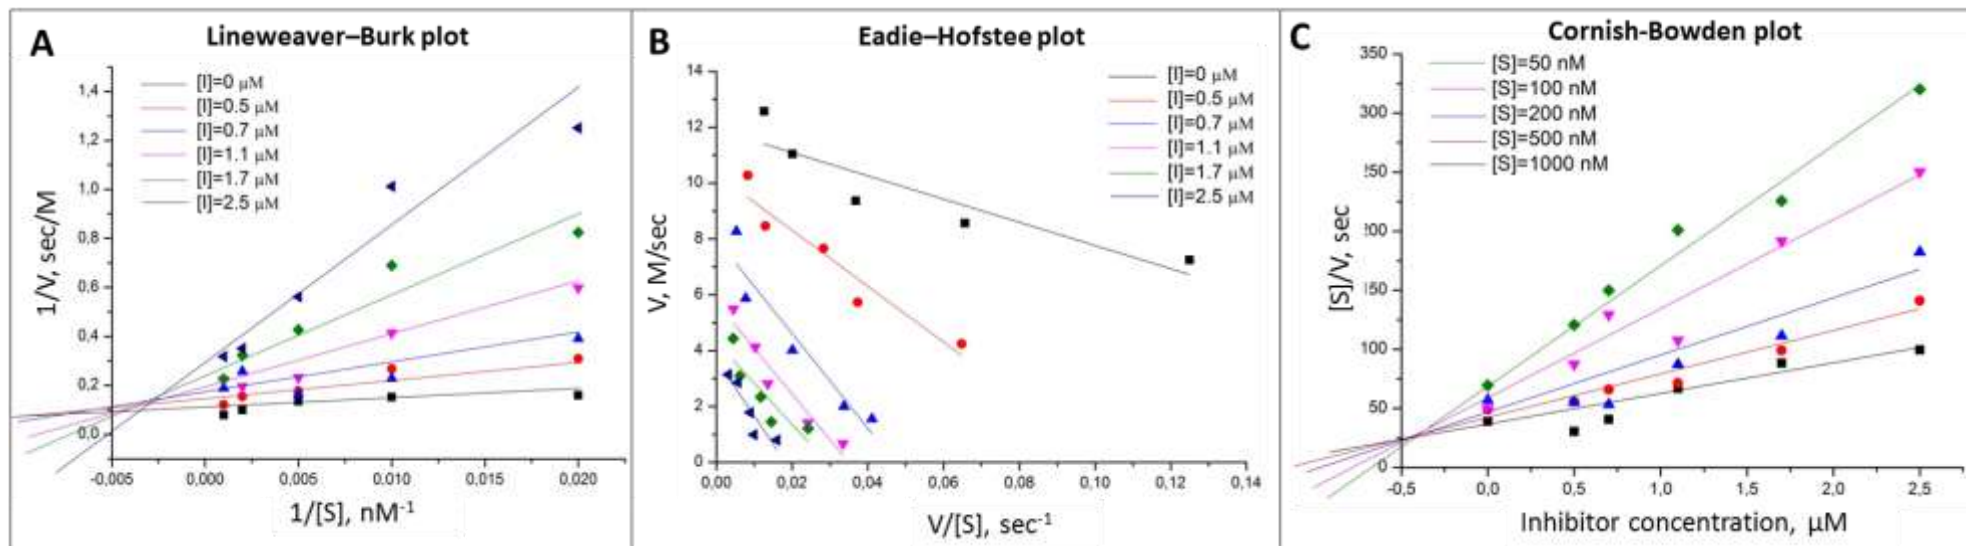

Inhibitor 6 (non-competitive)  $K_I = 7.9 \pm 0.8$

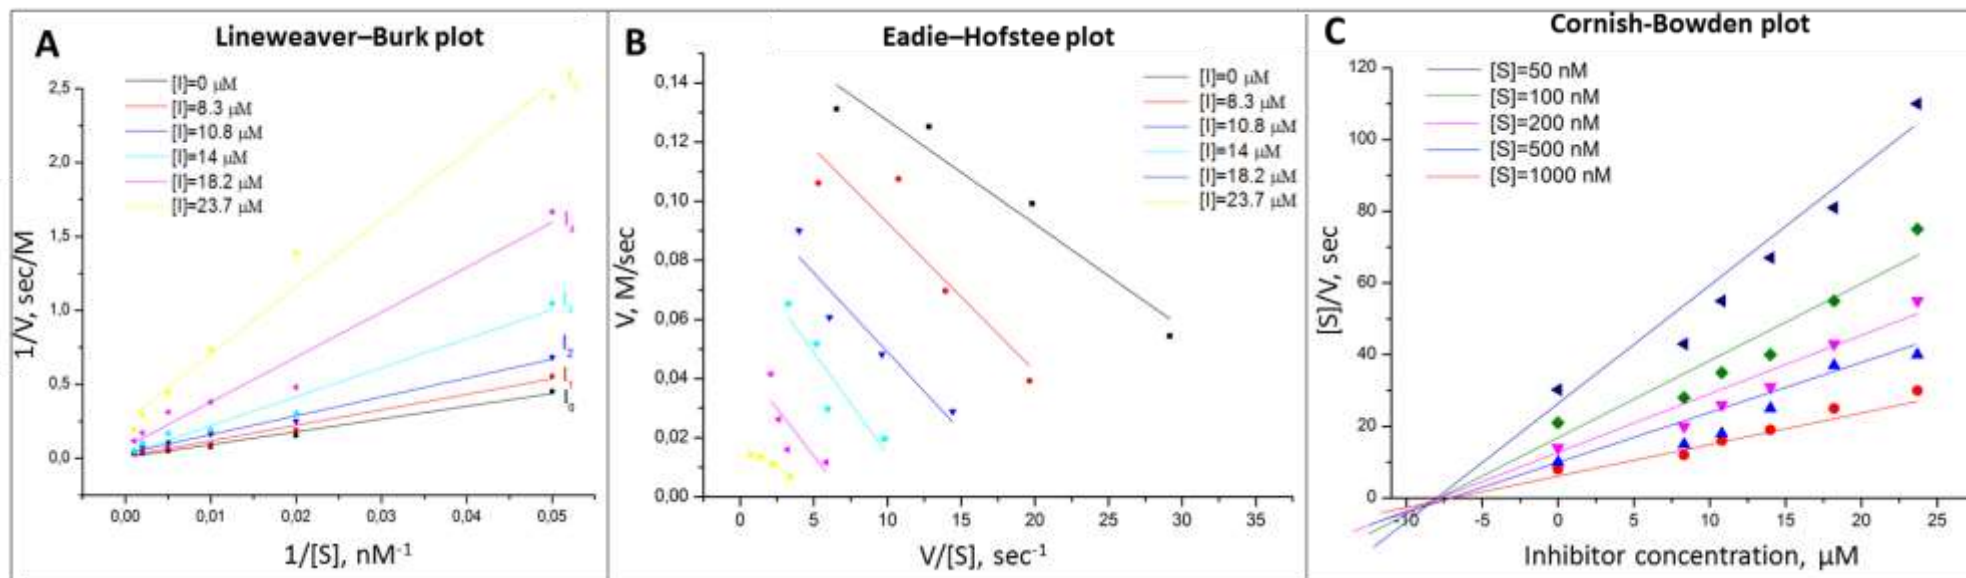

Inhibitor 7 (mixed)  $K_I = 0.9 \pm 0.3$

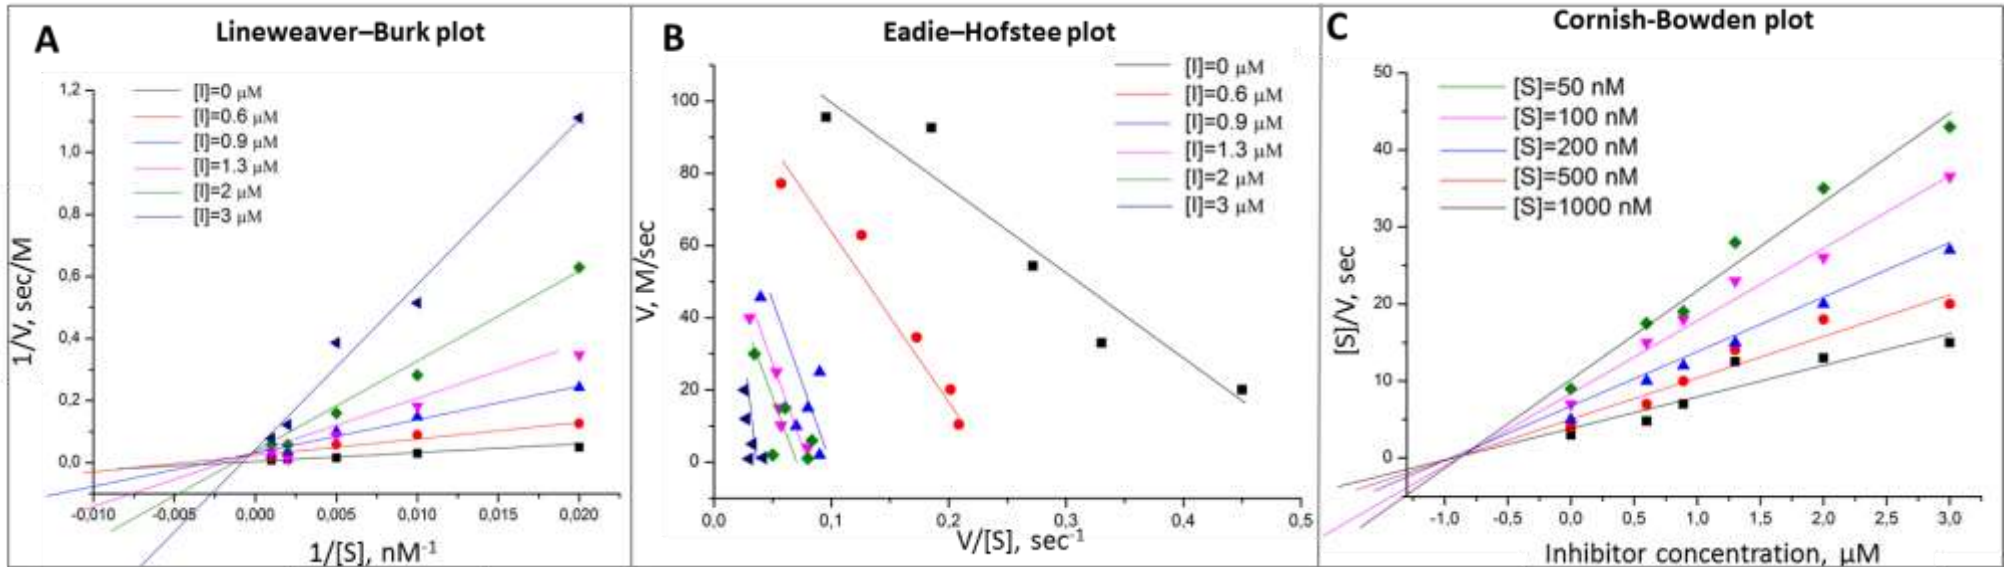

Inhibitor 10 (mixed)  $K_I = 1.7 \pm 0.4$

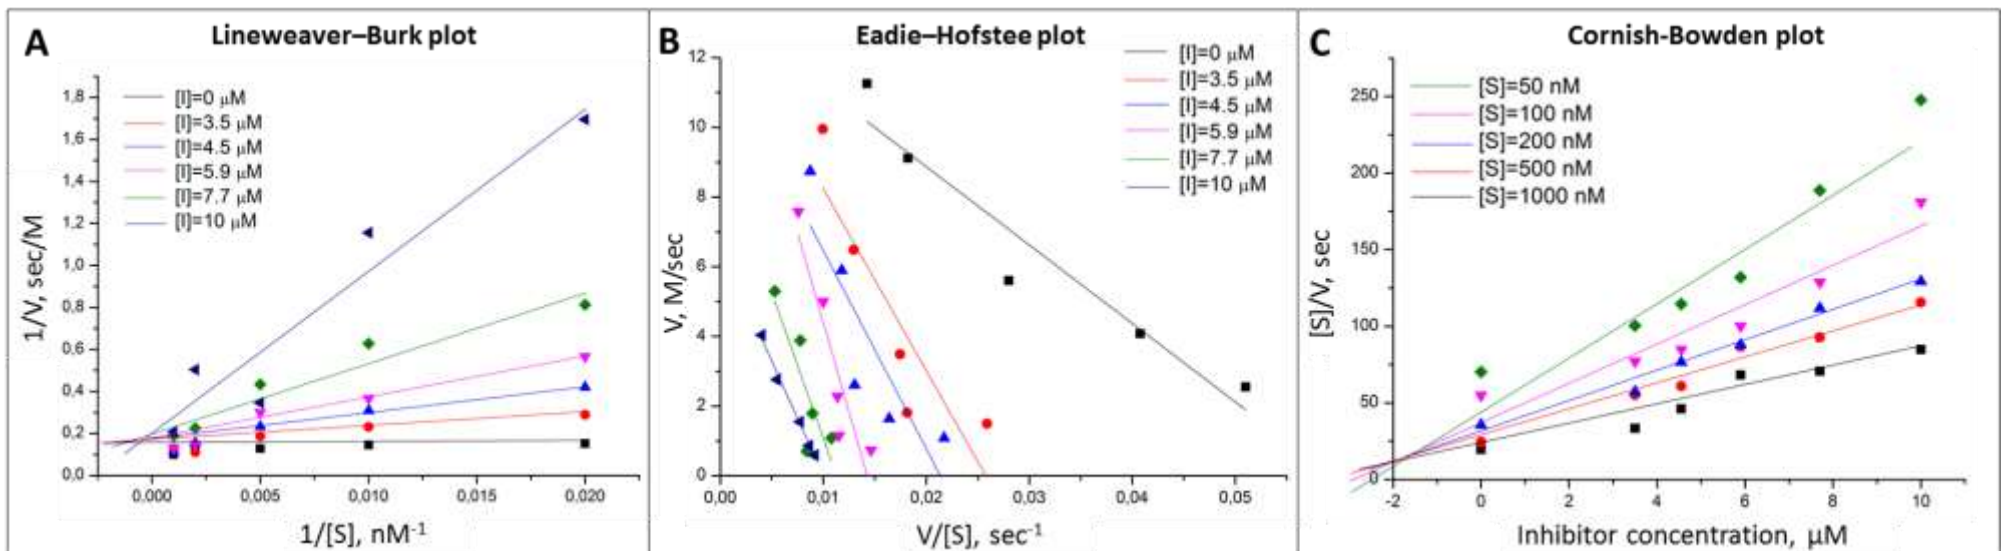

Inhibitor **11** (mixed)  $K_I = 0.2 \pm 0.1$

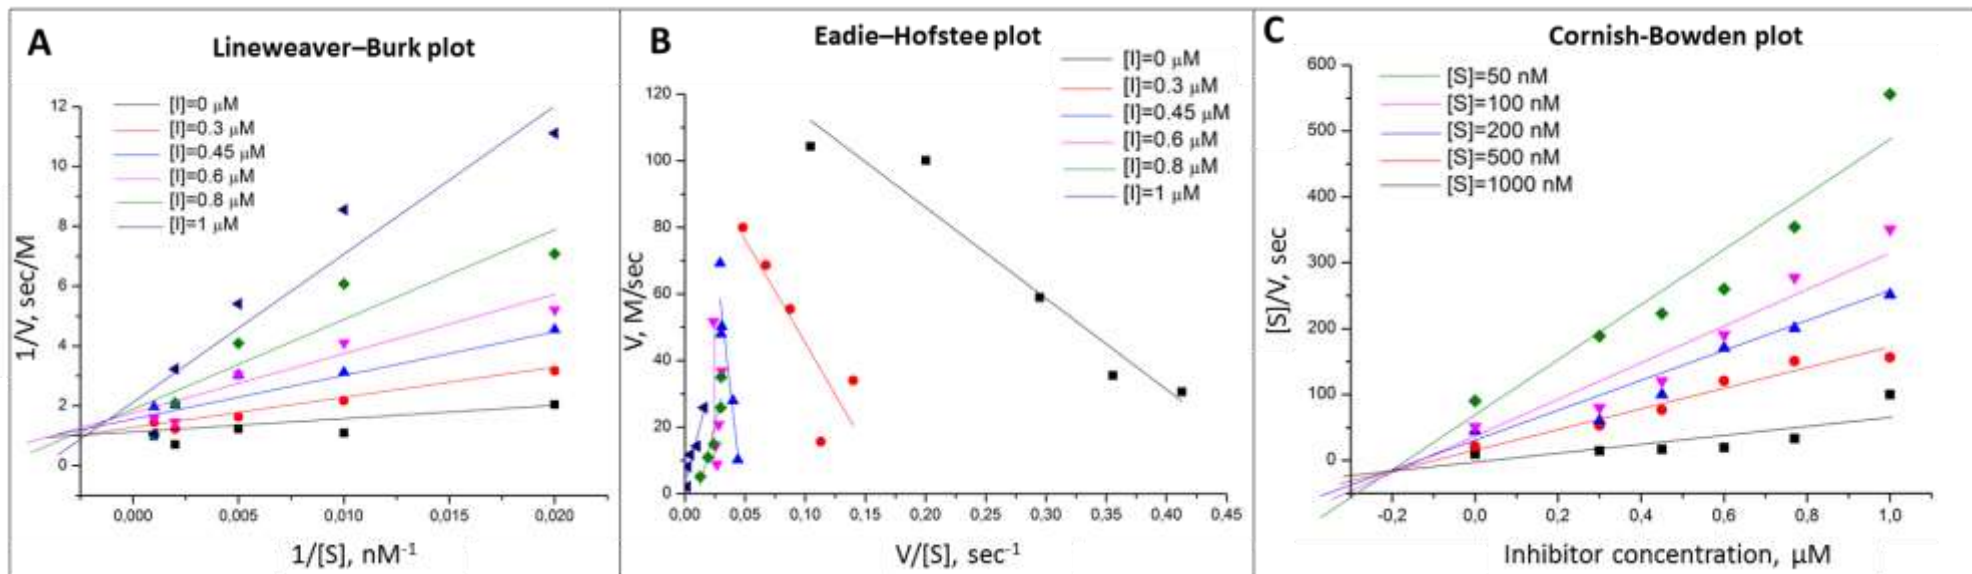

Inhibitor **21** (mixed)  $K_I = 0.3 \pm 0.2$

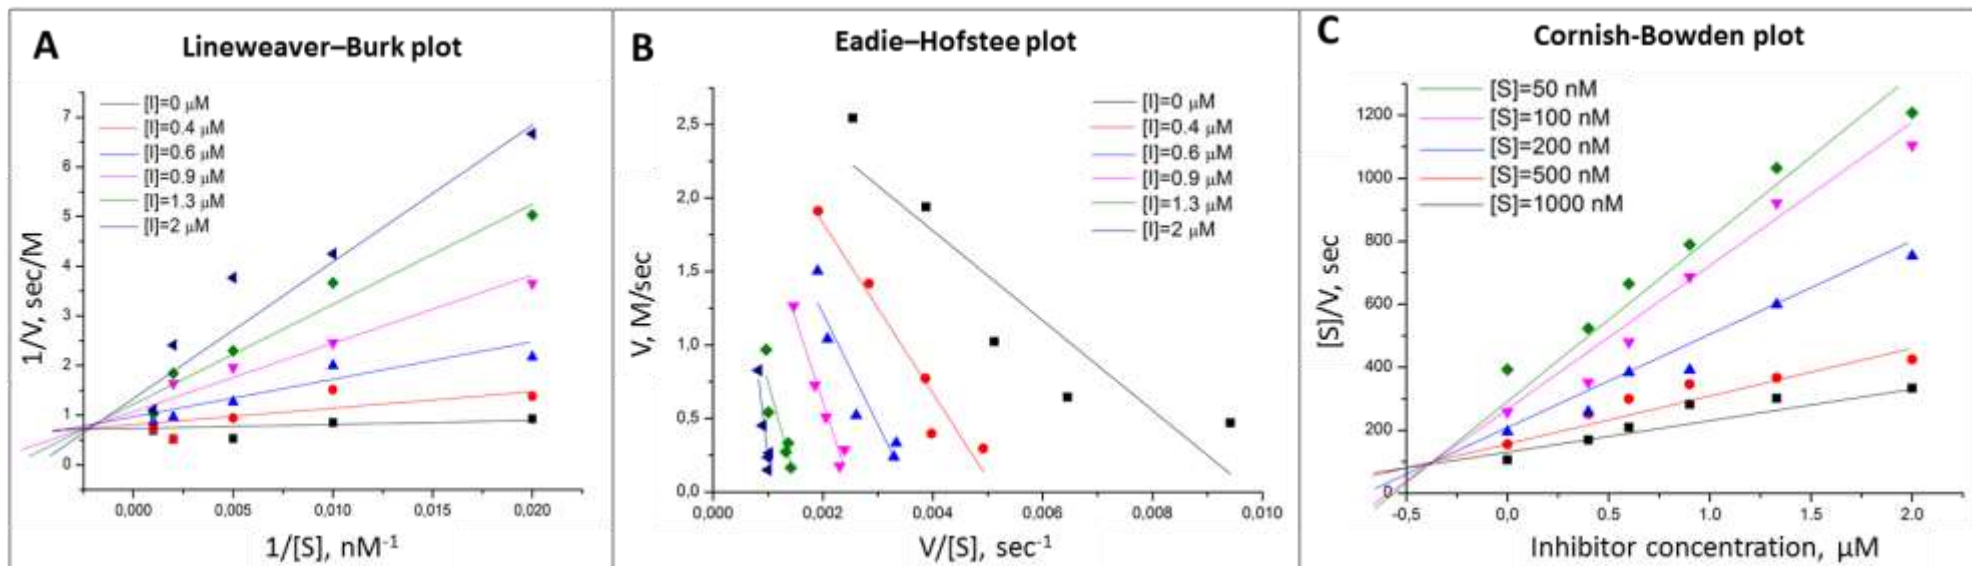

Inhibitor **41** (uncompetitive)  $K_I = 0.6 \pm 0.3$

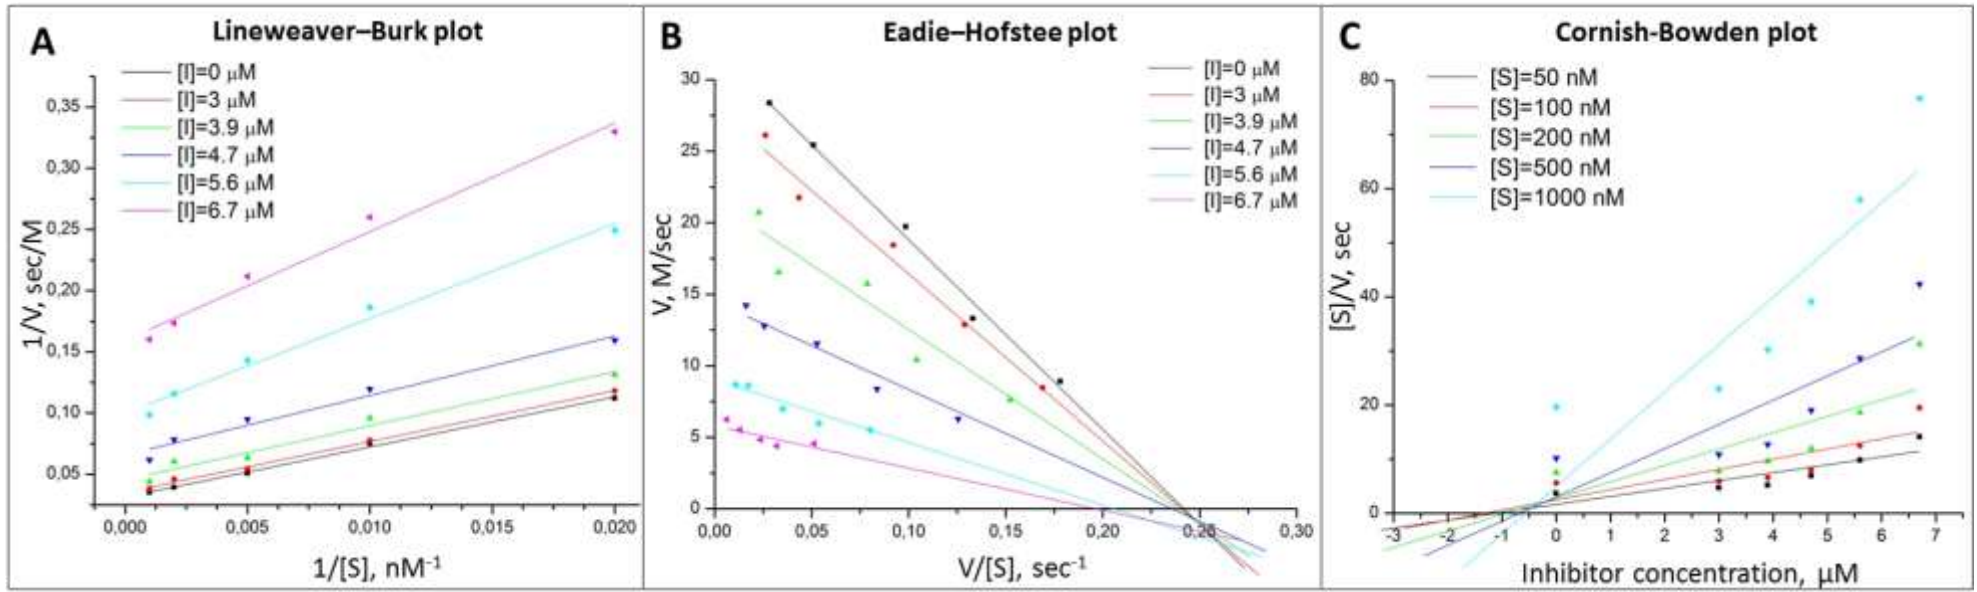

## $^{13}\text{C}$ -NMR spectrum (400 MHz) of compound 39 in $\text{D}_2\text{O}$ at 303 K

An important characteristic for 5-iodouracil derivatives is a strong displacement of a C-5 signal in  $^{13}\text{C}$ -NMR towards strong magnetic field (72.69 ppm) in comparison with C-5 in uracil and thymine analogues (110-100 ppm).

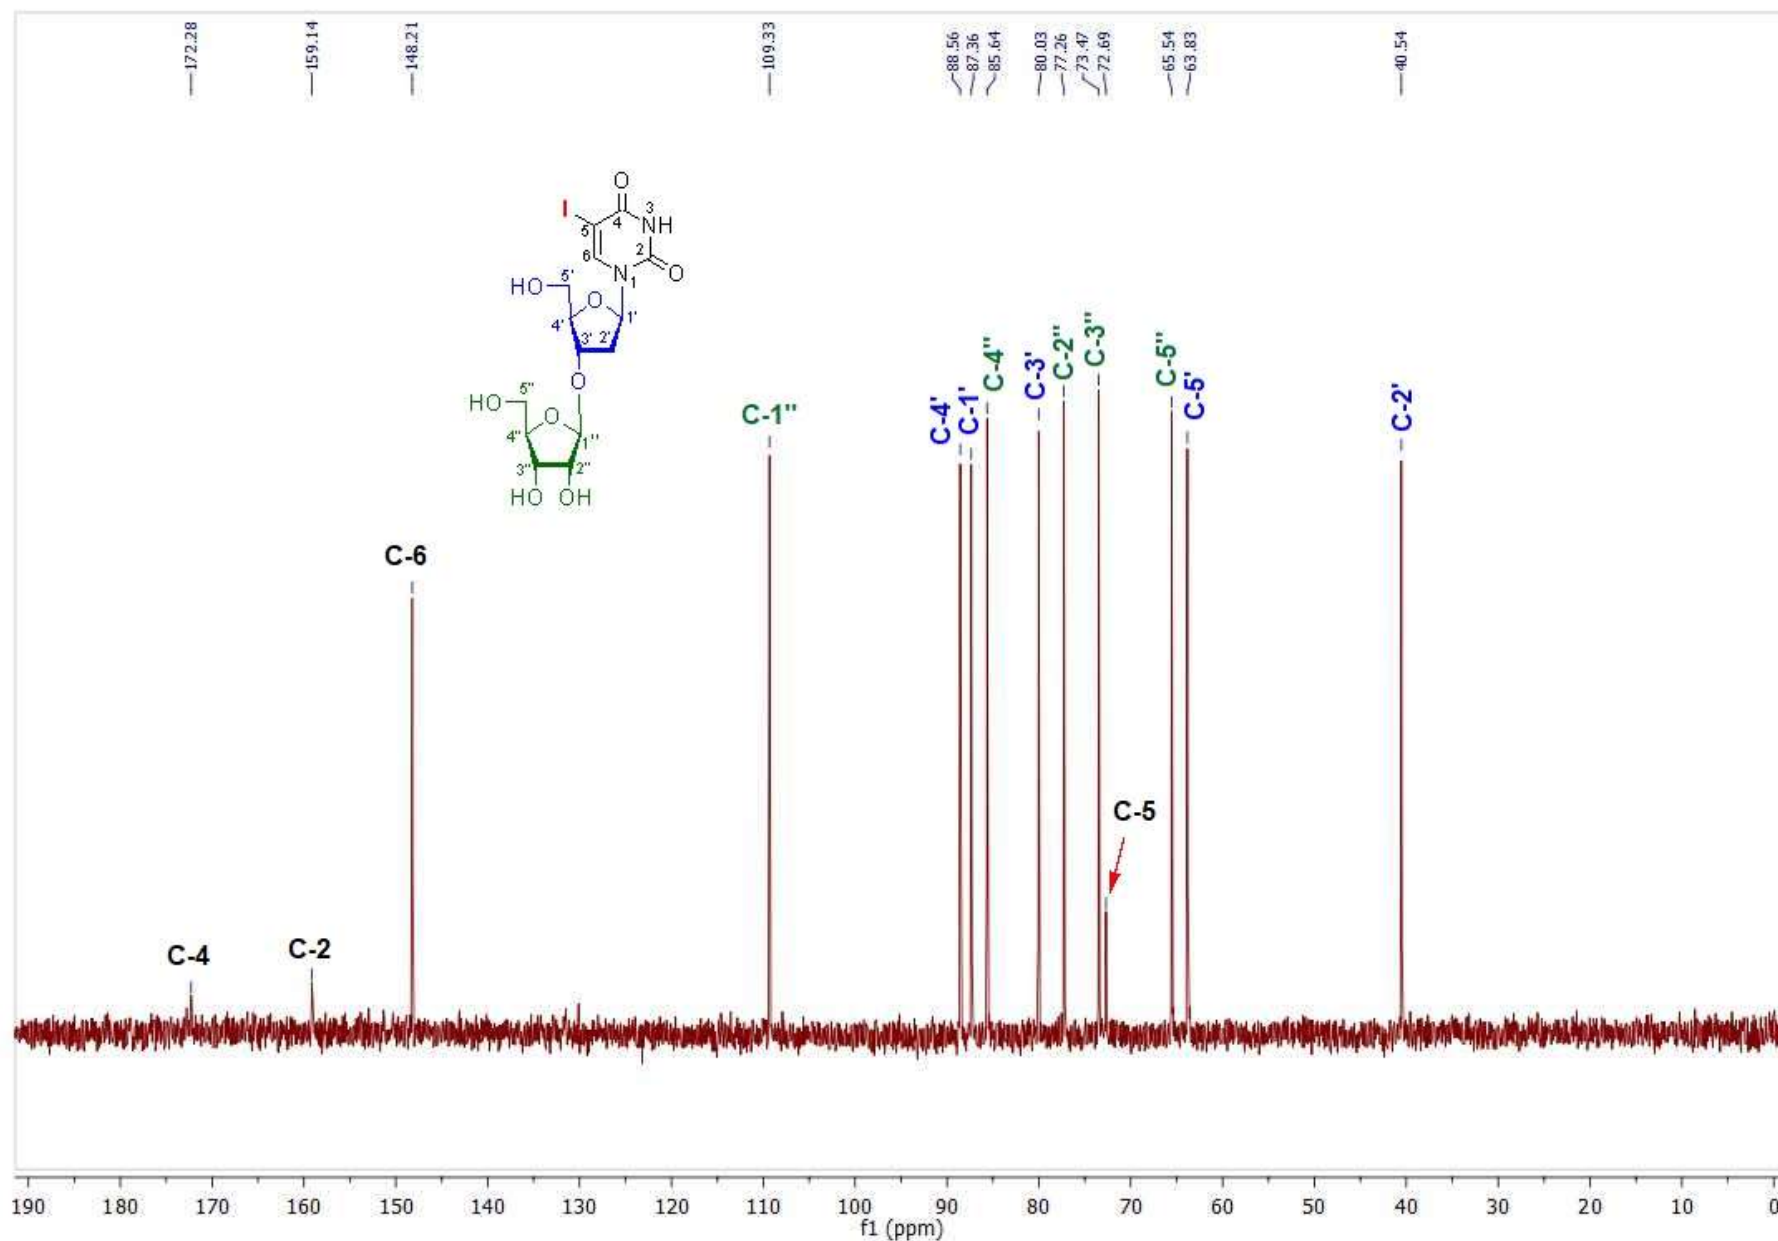

Supplement: IENZ_A_1509210_SM8339.pdf [file IENZ_A_1509210_SM8339.pdf]
